# Supplementary material
Source: publisher figshare collection journal article supplement (https://gsajournals.figshare.com/ndownloader/files/27476816)
Supplement: Supplementary file 1 [file 27476816]

## Sheet: revision_210127_supp_data_1
##Supplemental Data 1: Copy numbers of subtelomeric homologues
##Column Legend: gene - gene name; genome - assembly name; copy_num - adjusted copy number (total length of all the hits/length of the full gene); numhits - total number of blast hits of the gene in the genome; status - classification of the gene according to Xu et al.
gene	genome	copy_num	numhits	status
CAGL0A04829g	ref	1.00548	1	syntenic
CAGL0A04829g	JHU_Cniv_v1	1.00548	1	syntenic
CAGL0B00165r	ref	10	10	telomeric
CAGL0B00165r	JHU_Cniv_v1	10	10	telomeric
CAGL0B00220g	ref	1.45022	2	Non-sytenic/MLT related
CAGL0B00220g	JHU_Cniv_v1	3.12554	4	Non-sytenic/MLT related
CAGL0B00242g	ref	0.277477	2	syntenic
CAGL0B00242g	JHU_Cniv_v1	0.846847	4	syntenic
CAGL0D00176g	ref	0.989877	1	syntenic
CAGL0D00176g	JHU_Cniv_v1	0.989877	1	syntenic
CAGL0D06688g	ref	1.81524	3	syntenic
CAGL0D06688g	JHU_Cniv_v1	1.81524	3	syntenic
CAGL0E00297r	ref	9	9	telomeric
CAGL0E00297r	JHU_Cniv_v1	8.91892	9	telomeric
CAGL0E06556g	ref	0.969489	1	telomeric
CAGL0E06556g	JHU_Cniv_v1	0.969489	1	telomeric
CAGL0H10604g	ref	0.88729	1	syntenic
CAGL0H10604g	JHU_Cniv_v1	0.88729	1	syntenic
CAGL0I00286g	ref	6.36571	7	telomeric
CAGL0I00286g	JHU_Cniv_v1	8.23561	9	telomeric
CAGL0J00143r	ref	4	4	telomeric
CAGL0J00143r	JHU_Cniv_v1	4	4	telomeric
CAGL0J00165g	ref	0.996914	1	syntenic
CAGL0J00165g	JHU_Cniv_v1	0.996914	1	syntenic
CAGL0J11968g	ref	0.074383	1	telomeric
CAGL0J11968g	JHU_Cniv_v1	0.074383	1	telomeric
CAGL0L00319g	ref	0.984848	1	syntenic
CAGL0L00319g	JHU_Cniv_v1	0.961174	1	syntenic
CAGL0L13365r	ref	0.999707	2	telomeric
CAGL0L13365r	JHU_Cniv_v1	4	4	telomeric
CAGL0L13387r	ref	1	1	telomeric
CAGL0L13387r	JHU_Cniv_v1	4	4	telomeric
CAGL0L13398r	ref	0.996111	2	telomeric
CAGL0L13398r	JHU_Cniv_v1	4	4	telomeric
CAGL0L13409r	ref	1	1	telomeric
CAGL0L13409r	JHU_Cniv_v1	6	6	telomeric
CAGL0L13420r	ref	0.999707	2	telomeric
CAGL0L13420r	JHU_Cniv_v1	4	4	telomeric
CAGL0L13431r	ref	1	1	telomeric
CAGL0L13431r	JHU_Cniv_v1	4	4	telomeric
CAGL0L13442r	ref	0.996111	2	telomeric
CAGL0L13442r	JHU_Cniv_v1	4	4	telomeric
CAGL0L13453r	ref	1	1	telomeric
CAGL0L13453r	JHU_Cniv_v1	6	6	telomeric
CAGL0L13464r	ref	0.999707	2	telomeric
CAGL0L13464r	JHU_Cniv_v1	4	4	telomeric
CAGL0L13475r	ref	1	1	telomeric
CAGL0L13475r	JHU_Cniv_v1	4	4	telomeric
CAGL0L13486r	ref	0.996111	2	telomeric
CAGL0L13486r	JHU_Cniv_v1	4	4	telomeric
CAGL0L13497r	ref	1	1	telomeric
CAGL0L13497r	JHU_Cniv_v1	6	6	telomeric
CAGL0L13508r	ref	0.999707	2	telomeric
CAGL0L13508r	JHU_Cniv_v1	4	4	telomeric
CAGL0L13519r	ref	1	1	telomeric
CAGL0L13519r	JHU_Cniv_v1	4	4	telomeric
CAGL0L13530r	ref	0.996111	2	telomeric
CAGL0L13530r	JHU_Cniv_v1	4	4	telomeric
CAGL0L13541r	ref	1	1	telomeric
CAGL0L13541r	JHU_Cniv_v1	6	6	telomeric
CAGL0M14047g	ref	0.980556	1	syntenic
CAGL0M14047g	JHU_Cniv_v1	0.980556	1	syntenic
CAGL0M14069g	ref	0.199539	1	telomeric
CAGL0M14069g	JHU_Cniv_v1	0.39677	2	telomeric
CAGL0M14124r	ref	0.999707	2	telomeric
CAGL0M14124r	JHU_Cniv_v1	4	4	telomeric
CAGL0M14135r	ref	1	1	telomeric
CAGL0M14135r	JHU_Cniv_v1	4	4	telomeric
CAGL0M14146r	ref	0.996111	2	telomeric
CAGL0M14146r	JHU_Cniv_v1	4	4	telomeric
CAGL0M14157r	ref	1	1	telomeric
CAGL0M14157r	JHU_Cniv_v1	6	6	telomeric
CAGL0M14168r	ref	0.999707	2	telomeric
CAGL0M14168r	JHU_Cniv_v1	4	4	telomeric
CAGL0M14179r	ref	1	1	telomeric
CAGL0M14179r	JHU_Cniv_v1	4	4	telomeric
CAGL0M14190r	ref	0.996111	2	telomeric
CAGL0M14190r	JHU_Cniv_v1	4	4	telomeric
CAGL0M14201r	ref	1	1	telomeric
CAGL0M14201r	JHU_Cniv_v1	6	6	telomeric
CAGL0M14212r	ref	0.999707	2	telomeric
CAGL0M14212r	JHU_Cniv_v1	4	4	telomeric
CAGL0M14223r	ref	1	1	telomeric
CAGL0M14223r	JHU_Cniv_v1	4	4	telomeric
CAGL0M14234r	ref	0.996111	2	telomeric
CAGL0M14234r	JHU_Cniv_v1	4	4	telomeric
CAGL0M14245r	ref	1	1	telomeric
CAGL0M14245r	JHU_Cniv_v1	6	6	telomeric
CAGL0M14256r	ref	0.999707	2	telomeric
CAGL0M14256r	JHU_Cniv_v1	4	4	telomeric
CAGL0M14267r	ref	1	1	telomeric
CAGL0M14267r	JHU_Cniv_v1	4	4	telomeric
CAGL0M14278r	ref	0.996111	2	telomeric
CAGL0M14278r	JHU_Cniv_v1	4	4	telomeric
CAGL0M14289r	ref	1	1	telomeric
CAGL0M14289r	JHU_Cniv_v1	6	6	telomeric
